# Supplementary material for: Endometriosis and Adverse Pregnancy Outcomes: A Dual-Cohort Study of Over 4 Million California Births
Source: Research Square preprint supplement (doi:10.21203/rs.3.rs-7377239/v1), 2025-09-17
Supplement: Supplementary file 1 [file 454eecb96802934ccc6e42b7.docx]

Supplementary Table 1. Variable definitions.

|  | **HCAI** | | **Birth certificate indication** |
| --- | --- | --- | --- |
|  | **ICD-9** | **ICD-10** |  |
| Endometriosis | 617.x | N80 |  |
| Age at birth |  |  | X |
| Race/ethnicity |  |  | X |
| Education |  |  | X |
| Body mass index |  |  | X |
| Parity |  |  | X |
| Adequacy of prenatal care |  |  | X (month gestation at PNC initiation, number of visits, gestation at birth) |
| ART | V23.85 | O09.81 | X |
| History of infertility | V23.0 | O09.0 |  |
| Previous cesarean delivery |  |  | X |
| Preexisting hypertension | 642.0, 642.1, 642.2 | O11 | X |
| Preexisting diabetes | 648.0, 249, 250 | O24.0, O24.1, O24.2, O24.3, E10, E11, E12, E13, E14, P70.1 (infant) | X |
| Preterm birth |  |  | X (gestational age < 37 weeks) |
| Low birth weight |  |  | X (birthweight < 2500 grams) |
| Small for gestational age |  |  | X (birthweight <10th percentile for sex and gestational age) PMID: 24777216 |
| Appropriate for gestational age |  |  | X (birthweight 10th – 90th percentile for sex and gestational age) PMID: 24777216 |
| Large for gestational age |  |  | X (birthweight >90th percentile for sex and gestational age) PMID: 24777216 |
| Gestational hypertension | 642.3, 760.0 (infant) | O13 | X |
| Preeclampsia/eclampsia | 642.3, 642.4, 642.5, 642.6, 642.7 | O11, O14.0, O14.1, O14.2, O14.9, O15 | X |
| Gestational diabetes | 648.8, 775.0 (infant) | O24.4, P70.0 (infant) | X |
| Cesarean delivery | 669.7, 763.4 (infant), procedure code 74 | O82, P03.4 (infant), procedure code 10D00Z0, 10D00Z1, 10D00Z2 | X |
| Placenta previa | 641.0, 641.1, 762.0 (infant) | O44, P02.0 (infant) |  |
| Placental abruption | 641.2 | O45 | X |
| Severe maternal morbidity | Per CDC definition: https://www.cdc.gov/reproductivehealth/maternalinfanthealth/smm/severe-morbidity-ICD.htm | | |
| Major birth defect | See appendix in PMID 24949541 | | |

Supplementary Table 2. Mediation effect of assisted reproductive technology by adverse pregnancy outcome among people with endometriosis

| **Mediation effect of assisted reproductive technology** | **Total effecta** | **Direct effectb** | **Indirect effectc** | **Proportion mediatedd** |
| --- | --- | --- | --- | --- |
|  | aRR (95% CI) | aRR (95% CI) | aRR (95% CI) |  |
| <37 weeks gestation | 1.49 (1.38, 1.60) | 1.48 (1.37, 1.60) | 1.00 (1.00, 1.00) | 1.22% |
| Low birth weighte | 1.46 (1.34, 1.60) | 1.46 (1.34, 1.60) | 1.00 (1.00, 1.00) | 0.00% |
| LGA | 1.05 (0.97, 1.14) | 1.05 (0.97, 1.14) | 1.00 (1.00, 1.00) | 1.03% |
| Gestational HTN | 1.27 (1.13, 1.42) | 1.26 (1.13, 1.42) | 1.00 (1.00, 1.00) | 1.26% |
| Preeclampsiae | 1.47 (1.33, 1.62) | 1.47 (1.33, 1.63) | 1.00 (1.00, 1.00) | 0.00% |
| Gestational diabetes | 1.19 (1.12, 1.28) | 1.19 (1.12, 1.27) | 1.00 (1.00, 1.00) | 1.26% |
| Cesarean deliverye | 1.66 (1.61, 1.71) | 1.66 (1.61, 1.71) | 1.00 (1.00, 1.00) | 0.29% |
| Placenta previae | 5.25 (4.72, 5.84) | 5.23 (4.70, 5.82) | 1.00 (1.00, 1.01) | 0.50% |
| Placental abruption | 1.90 (1.59, 1.27) | 1.89 (1.58, 2.26) | 1.01 (1.00, 1.01) | 1.06% |
| Severe maternal morbidity | 2.36 (2.11, 2.63) | 2.35 (2.10, 2.62) | 1.00 (1.00, 1.01) | 0.73% |

Models adjusted for maternal age, race/ethnicity, education, BMI, parity, adequacy of prenatal care, history of infertility, previous cesarean delivery, preexisting hypertension, preexisting diabetes

aEffect of endometriosis on adverse pregnancy outcome

bEffect of endometriosis on adverse pregnancy outcome that is not mediated by assisted reproductive technology

cEffect of endometriosis on adverse pregnancy outcome mediated by assisted reproductive technology

dProportion of effect of endometriosis on adverse pregnancy outcomes mediated by assisted reproductive technology

emodeled with interaction term between exposure and mediator
